# Supplementary material for: Platinum nanoparticles supported on a bi-metal oxide grown carbon nanostructure as an ethanol electro-oxidation electrocatalyst
Source: Royal Society of Chemistry journal article supplement (doi:10.1039/c3ta13070c), 2013-01-01
Supplement: c3ta13070c.pdf [file c3ta13070c.pdf]

*Supplementary data (Journal of Materials Chemistry A)*

**Platinum nanoparticles supported on bi-metal oxide grown carbon nanostructure as ethanol electro-oxidation electrocatalyst**

Divya P. and Ramaprabhu S.\*

Alternative Energy and Nanotechnology Laboratory (AENL), Nano Functional Materials Technology Centre (NFMTC), Department of Physics, Indian Institute of Technology Madras, India. \* Phone: +91-44-22574862; E-mail: [ramp@iitm.ac.in](mailto:ramp@iitm.ac.in)

**1. Material Synthesis**

**1.1 Synthesis of carbon nanostructure.**

A simple sol-gel technique was applied to synthesize Fe-Sn-O catalyst particles. Initially, required molar ratios of FeCl<sub>3</sub>, SnCl<sub>2</sub>, and C<sub>6</sub>H<sub>8</sub>O<sub>7</sub> · H<sub>2</sub>O were mixed with ethanol to make the sol. Thereafter, the sol was heated at 80 °C to convert to gel. The prepared gel was heated at 700 °C around 2 hour to get Fe-Sn-O particles. The obtained catalyst particles were sprinkled on a quartz boat and it was placed at the middle of a quartz tube. Further the quartz tube was inserted into a furnace. Ends of the quartz tube were closed with coupling arrangements. The flow rate of Argon (Ar), hydrogen (H<sub>2</sub>) and acetylene (C<sub>2</sub>H<sub>2</sub>) maintained was 60, 40 and 40 sccm respectively. Argon gas was allowed throughout the experiment. Initially argon gas was flowed for 5 minutes to make an inert environment. Then furnace temperature was set to 700 °C. Further acetylene (C<sub>2</sub>H<sub>2</sub>) and hydrogen (H<sub>2</sub>) gases were flowed through the quartz tube at 700 °C for 20-25 minutes. The furnace was cooled down to room temperature and as-grown sample was taken out.

**1.2 Synthesis of multi walled carbon nanotube**

MmNi<sub>3</sub> alloy hydride catalyst has been synthesized by hydrogen decrepitation of MmNi<sub>3</sub> alloy which is synthesized by arc melting technique. The catalyst sprinkled quartz boat was inserted to

a quartz tube. Further, the quartz tube was inserted into a tubular furnace. Ends of the quartz tube were closed with coupling arrangements. The flow rate of Argon (Ar), hydrogen ( $H_2$ ) and acetylene ( $C_2H_2$ ) maintained was 160, 50 and 50 sccm respectively. Argon gas was allowed throughout the experiment. Initially argon gas was flowed for 5 minutes to make an inert environment. Then furnace temperature was set to 500 °C. Further hydrogen ( $H_2$ ) gases were flowed through the quartz tube at 500 °C for 45 minutes. After 45 minutes hydrogen has been stopped. Further, furnace temperature was set to 700 °C. Acetylene ( $C_2H_2$ ) gas was flowed through the quartz tube at 700 °C for 30 minutes. Acetylene has been stopped after 30 minutes. The furnace was cooled down to room temperature and as-grown sample was taken out.

## 2. Results and discussion

Figure S1 Shows the XRD of Pt/C. Figure S2 shows the SEM image, EDX spectrum and TEM image of commercially available platinum on Vulcan XC-72. Figure S3 shows the cyclic voltammogram of Pt/C, Pt/MWNT and Pt/CNS-FSO.

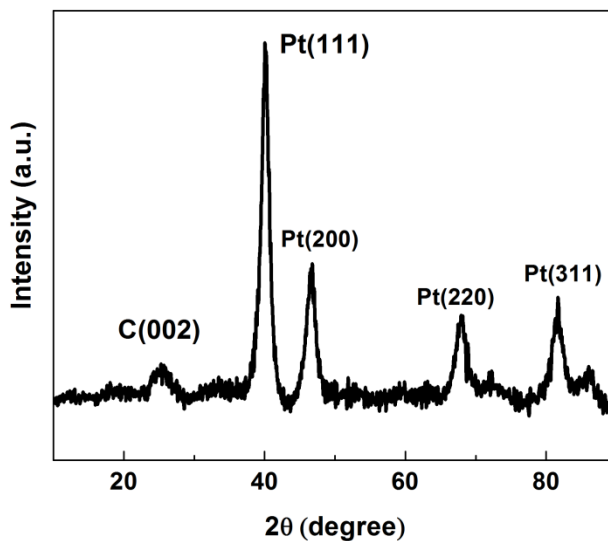

Figure S1. XRD of commercial Pt/C

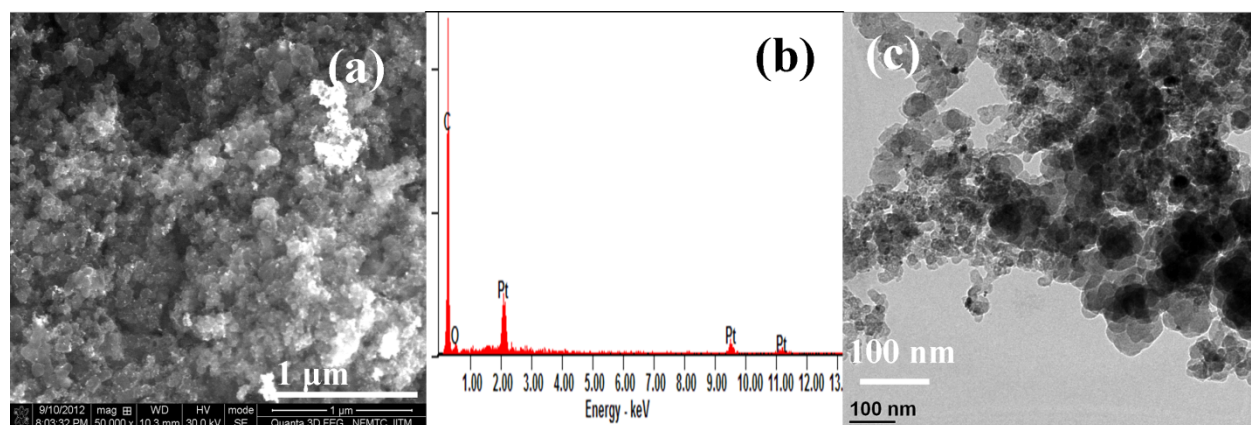

Figure S2. (a) SEM image, (b) EDX spectrum and (c) TEM image of commercially available platinum on Vulcan XC-72

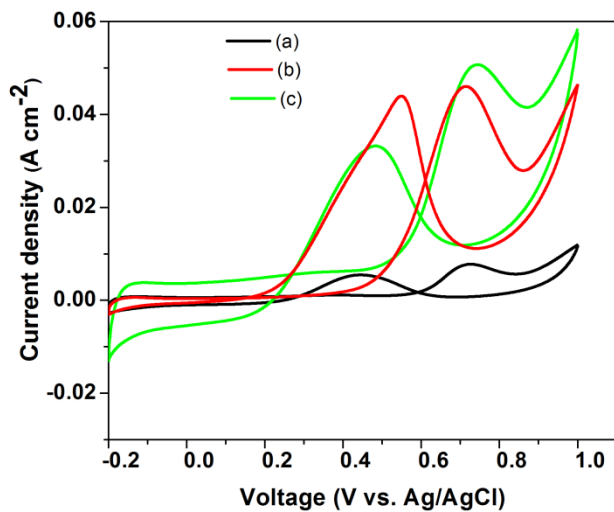

Figure S3. Cyclic voltammogram of (a) Pt/C, (b) Pt/f-MWNT and (c) Pt/CNS-FSO.
